# Supplementary material for: Health Effects Related to Wind Turbine Sound: An Update
Source: MDPI journal article supplement (doi:10.3390/ijerph18179133), 2021-08-30
Supplement: s1 [file s1]

**Supplementary Materials** is provided in the Annexes : Annex 1: Search profiles Annex 2: Glossary .

## S1: Key search terms for the period from 2017-2020

**For the period up to July 2018 the same search strategy was followed as for our previous review [2] .**

Table S1: Search Profiles per database and topic

|                                                                                                                                                                                                                                                                                                                                                                              |
|------------------------------------------------------------------------------------------------------------------------------------------------------------------------------------------------------------------------------------------------------------------------------------------------------------------------------------------------------------------------------|
| <b>Search strategy in Scopus, July 2018-July 2020</b>                                                                                                                                                                                                                                                                                                                        |
| <i>Topic: health effects of wind turbine sound</i>                                                                                                                                                                                                                                                                                                                           |
| TITLE ( "wind turbine*" OR "windmill*" OR "windmill*" OR "windfarm*" OR "wind farm*" OR "windpark*" OR "wind park*" OR "windenerg*" OR "wind energ*" ) )                                                                                                                                                                                                                     |
| AND ( TITLE ( "health effect*" OR "health risk*" OR "stress" OR "annoy*" OR "health impact*" OR "sleep" OR "noise avoid*" OR "noise abat*" OR "preval*" OR "inciden*" OR "adverse" OR "human health*" OR "avers*" OR "attitud*" OR "percept*" OR "perceiv*" OR "quality of life" OR "well being" OR "wellbeing" OR "concern*" OR "emot*" OR "accept*" ) ) AND PUBYEAR > 2017 |
| <i>Topic: low frequency effects</i>                                                                                                                                                                                                                                                                                                                                          |
| TITLE( "infrasound*" OR "low frequency nois*" OR "low frequency sound*" OR "infrasonic*" OR "low frequency thresh*" OR "audibi*" )                                                                                                                                                                                                                                           |
| AND (TITLE("health effect*" OR "risk*" OR "stress" OR "annoy*" OR "health impact*" OR "sleep" OR "noise avoid*" OR "noise abat*" OR "preval*" OR "inciden*" OR "adverse" OR "human health*" OR "avers*" OR "attitud*" OR "percept*" OR "perceiv*" OR "quality of life" OR "well being" OR "wellbeing" OR "concern*" OR "emot*" OR "accept*" ) )                              |
| AND PUBYEAR > 2017                                                                                                                                                                                                                                                                                                                                                           |
|                                                                                                                                                                                                                                                                                                                                                                              |
| <b>Search strategy in Embase, July 2018-July 2020</b>                                                                                                                                                                                                                                                                                                                        |
| <i>Topics: health effects of wind turbine sound and low frequency effects</i>                                                                                                                                                                                                                                                                                                |
| #1. 'wind turbine'/exp OR 'wind farm'/exp OR 'wind turbine':ti,ab OR 'wind farm':ti,ab OR 'wind power'/exp                                                                                                                                                                                                                                                                   |
| #2. 'low frequency noise'/exp OR (low:ti AND frequency:ti AND ('noise':ti OR 'signal':ti OR 'noise':ti,ab OR 'low frequency sound':ti,ab OR 'low frequency ultrasound':ti,ab OR 'low frequency signal':ti,ab OR 'low frequency thresh':ti,ab OR 'infrasound'/exp OR 'infraso':ti OR 'audability':ti,ab OR 'audibl':ti                                                        |
| #3. 'noise'/exp/mj OR 'nois':ti OR 'noise pollution'/exp/mj                                                                                                                                                                                                                                                                                                                  |
| #4. 'hearing'/exp/mj                                                                                                                                                                                                                                                                                                                                                         |
| #5. 'sound'/exp/mj OR 'sound':ti                                                                                                                                                                                                                                                                                                                                             |
| #6. 'annoyance'/exp OR 'annoy':ti                                                                                                                                                                                                                                                                                                                                            |
| #7. 'wellbeing'/exp OR 'health':ti OR 'health'/exp OR 'health status'/exp OR 'wellbeing':ti                                                                                                                                                                                                                                                                                  |
| #8. 'aversion':ti OR 'stress':ti OR 'complain':ti OR 'distress':ti OR 'disturb':ti OR 'worries':ti OR (('sensiti*' NEAR/3 noise):ti) OR 'sound pressure level':ti OR 'sleep disturbance':ti OR 'sleep quality':ti OR 'stress'/exp OR 'cognitive':ti OR 'aversion'/exp OR 'distress syndrome'/exp OR 'sleep quality'/exp OR 'perception':ti OR 'unpleasant':ti                |
| #9. 'quality of life'/exp OR ('quality':ti AND ('life':ti OR living:ti))                                                                                                                                                                                                                                                                                                     |
| #10. #2 OR #3 OR #4 OR #5 OR #6 OR #7 OR #8 OR #9                                                                                                                                                                                                                                                                                                                            |
| #11. #6 OR #7 OR #8 OR #9                                                                                                                                                                                                                                                                                                                                                    |
| #12. #1 AND #10                                                                                                                                                                                                                                                                                                                                                              |
| #13. #1 AND #10 AND [2017-2020]/py                                                                                                                                                                                                                                                                                                                                           |
| #14. #1 AND #10 AND [2017-2020]/py AND ([dutch]/lim OR [english]/lim OR [french]/lim OR [german]/lim)                                                                                                                                                                                                                                                                        |
| #15. #2 AND #11 NOT #1                                                                                                                                                                                                                                                                                                                                                       |
| #16. #2 AND #11 NOT #1 AND [2017-2020]/py                                                                                                                                                                                                                                                                                                                                    |

|                                                                                                                                                                                                                                                                                                                                                                                                                                                                                                                                                                   |
|-------------------------------------------------------------------------------------------------------------------------------------------------------------------------------------------------------------------------------------------------------------------------------------------------------------------------------------------------------------------------------------------------------------------------------------------------------------------------------------------------------------------------------------------------------------------|
| ##17. #2 AND #11 NOT #1 AND [2017-2020]/py AND ([dutch]/lim OR [english]/lim OR [french]/lim OR [german]/lim)                                                                                                                                                                                                                                                                                                                                                                                                                                                     |
|                                                                                                                                                                                                                                                                                                                                                                                                                                                                                                                                                                   |
| <b>Search strategy in Psycinfo, Januari 2017-July 2020</b>                                                                                                                                                                                                                                                                                                                                                                                                                                                                                                        |
| <i>Topic: health effects of wind turbine sound</i>                                                                                                                                                                                                                                                                                                                                                                                                                                                                                                                |
| ((("health effect*" or "risk*" or "stress*" or "annoy*" or "health impact*" or "sleep*" or "noise avoid*" or "noise abat*" or "preval*" or "inciden*" or "adverse" or "human health*" or "avers*" or "attitud*" or "percept*" or "perceiv*" or "quality of life" or "well being" or "wellbeing" or "concern*" or "emot*" or "accept*" or "commun*" or "engag*" or "activis*" or "prefer*").m_titl.) and (("wind turbine*" or "wind farm*" or "wind park*" or "windfarm*" or "windpark*" or "windmill*" or "wind mill*" or "wind energ*" or "windenerg*").m_titl.) |
| <i>Topic: low frequency effects</i>                                                                                                                                                                                                                                                                                                                                                                                                                                                                                                                               |
| ((("health effect*" or "risk*" or "stress" or "annoy*" or "health impact*" or "sleep*" or "noise avoid*" or "noise abat*" or "preval*" or "inciden*" or "adverse" or "human health*" or "avers*" or "attitud*" or "percept*" or "perceiv*" or "quality of life" or "well being" or "wellbeing" or "concern*" or "emot*" or "accept*" or "commun*" or "engag*" or "activis*" or "prefer*").m_titl. and ("infrasound*" or "low frequency nois*" or "low frequency sound*" or "infrasonic*" or "low frequency thresh*" or "audibi").m_titl. -----                    |

## S2: Glossary

|                     |                                                                                                                          |
|---------------------|--------------------------------------------------------------------------------------------------------------------------|
| ACC                 | Anterior cingulate cortex                                                                                                |
| AM                  | Amplitude Modulation                                                                                                     |
| Atrial fibrillation | Irregular and often rapid heart rate                                                                                     |
| BMI                 | Body Mass Index                                                                                                          |
| CI                  | Confidence interval                                                                                                      |
| CNHS                | Canadian Noise and Health study                                                                                          |
| Cross-sectional     | A study at one specific point in time                                                                                    |
| CTL                 | Community Tolerance Level                                                                                                |
| DALY                | Disability-adjusted life year                                                                                            |
| dB                  | decibel, a measure for the level of sound                                                                                |
| dBA                 | A-weighted decibel, corrected for human hearing                                                                          |
| DEFRA               | U.K. Department for Environment, Food & Rural Affairs                                                                    |
| DEN                 | Day-evening-night equivalent level                                                                                       |
| EEG                 | Electroencephalographics (recordings)                                                                                    |
| EER                 | Exposure Effect Relation                                                                                                 |
| EMG                 | Electromyogram                                                                                                           |
| Et al               | denotes the co-authors of a publication                                                                                  |
| EU                  | European Union                                                                                                           |
| FFR                 | Frequency Following Response                                                                                             |
| (%)HA               | (percentage) Highly annoyed people                                                                                       |
| (%)HSD              | (percentage) Highly Sleep Disturbed people                                                                               |
| IHD                 | Ischemic Heart Disease                                                                                                   |
| Incidence           | Measure of the probability of occurrence of a given (medical) condition in a population within a specific period of time |
| L <sub>den</sub>    | Day-evening-night equivalent sound level                                                                                 |
| L <sub>dn</sub>     | Day-night equivalent sound level                                                                                         |
| L <sub>Aeq</sub>    | A-weighted equivalent sound pressure level averaged over a period of time                                                |
| L <sub>night</sub>  | Nighttime equivalent sound level                                                                                         |
| MW                  | MegaWatt (million Watt)                                                                                                  |
| NAS                 | Noise Annoyance Stress                                                                                                   |
| NS                  | Noise sensitivity                                                                                                        |
| OR                  | Odds ratio                                                                                                               |
| Polysomnography     | A test used to diagnose sleep disorders.                                                                                 |
| Prevalence          | Actual number of cases of disease or injury present in a population at any particular moment in time                     |
| PRISMA              | Preferred Reporting Items for Systematic reviews and Meta-Analyses                                                       |
| REM                 | Rapid eye movement (sleep stage)                                                                                         |
| SD                  | Standard deviation                                                                                                       |
| SPL                 | Sound Pressure Level: the actual sound level in certain conditions or at a certain time                                  |
| VAD                 | Vibroacoustic disease                                                                                                    |
| VVVD                | Visceral vibratory vestibular disease                                                                                    |
| WHO                 | World Health Organization                                                                                                |
| WT                  | Wind Turbine                                                                                                             |
| WTA                 | Willingness to Accept                                                                                                    |
| WTP                 | Willingness to pay                                                                                                       |
